# Supplementary material for: Accurate measurement of effective Li–Li scalar coupling constants: the NMR missing link for alkyllithium aggregates
Source: Royal Society of Chemistry journal article supplement (doi:10.1039/d0cc06871c), 2020-01-01
Supplement: d0cc06871c1.pdf [file d0cc06871c1.pdf]

# Accurate Measurement of Effective Li-Li Scalar Coupling Constants: the NMR Missing Link for Alkyl lithium Aggregates.

Matthieu Hedouin,<sup>[a]</sup> Anne Harrison-Marchand,<sup>[a]</sup> Jacques Maddaluno<sup>[a]</sup> and Hassan Oulyadi\*<sup>[a]</sup>

<sup>[a]</sup> Normandie Univ, UNIROUEN, INSA de Rouen, CNRS  
Laboratoire COBRA (UMR 6014 & FR 3038), 76000 Rouen, France

## Table of Contents

|                                                                                                                                                                                                                                                                                                                                                                                                                                                                                                                                                                                                                                     |     |
|-------------------------------------------------------------------------------------------------------------------------------------------------------------------------------------------------------------------------------------------------------------------------------------------------------------------------------------------------------------------------------------------------------------------------------------------------------------------------------------------------------------------------------------------------------------------------------------------------------------------------------------|-----|
| <b>1. General considerations</b>                                                                                                                                                                                                                                                                                                                                                                                                                                                                                                                                                                                                    | 2S  |
| <b>2. Experimental procedures</b>                                                                                                                                                                                                                                                                                                                                                                                                                                                                                                                                                                                                   | 2S  |
| 2.1. Alkyl lithium salt-free solutions in tetrahydrofuran- <i>d</i> <sub>8</sub> or diethylether- <i>d</i> <sub>10</sub>                                                                                                                                                                                                                                                                                                                                                                                                                                                                                                            | 2S  |
| 2.2. Alkyl lithium salt-free solutions in dibutylether/toluene- <i>d</i> <sub>8</sub> (80 :20)                                                                                                                                                                                                                                                                                                                                                                                                                                                                                                                                      | 2S  |
| 2.3. Methyl lithium / <i>n</i> -Butyl lithium (ratio 1 : 1) in THF- <i>d</i> <sub>8</sub> solution                                                                                                                                                                                                                                                                                                                                                                                                                                                                                                                                  | 2S  |
| 2.4. Methyl lithium / Ethyl lithium (ratio 1 : 0.8) in THF- <i>d</i> <sub>8</sub> solution                                                                                                                                                                                                                                                                                                                                                                                                                                                                                                                                          | 2S  |
| 2.5. Ethyl lithium / <i>n</i> -Butyl lithium (ratio 1 : 0.8) in THF- <i>d</i> <sub>8</sub> solution                                                                                                                                                                                                                                                                                                                                                                                                                                                                                                                                 | 2S  |
| 2.6. Alkyl lithium mixture (ratio 1 : 1) in Et <sub>2</sub> O or ( <i>n</i> -Bu) <sub>2</sub> O solution                                                                                                                                                                                                                                                                                                                                                                                                                                                                                                                            | 2S  |
| 2.7. NMR parameters and conditions                                                                                                                                                                                                                                                                                                                                                                                                                                                                                                                                                                                                  | 3S  |
| <b>3. References</b>                                                                                                                                                                                                                                                                                                                                                                                                                                                                                                                                                                                                                | 3S  |
| <b>4. NMR data</b>                                                                                                                                                                                                                                                                                                                                                                                                                                                                                                                                                                                                                  | 4S  |
| <b>Figure 1S.</b> Variable temperature NMR 1D <sup>7</sup> Li spectra of MeLi/ <i>n</i> -BuLi mixture in THF- <i>d</i> <sub>8</sub>                                                                                                                                                                                                                                                                                                                                                                                                                                                                                                 | 4S  |
| <b>Figure 2S:</b> Plot of the intensity ratio $I_{\text{cross}}/I_{\text{diag}}$ versus constant time for (MeLi) <sub>4-n</sub> ( <i>n</i> -BuLi) <sub>n</sub> mixed aggregates.                                                                                                                                                                                                                                                                                                                                                                                                                                                    | 4S  |
| <b>Figure 3S:</b> (a) 2D <sup>7</sup> Li- <sup>7</sup> Li EXSY spectra (mixing times $\tau_m = 0.5\text{s}$ , $0.7\text{s}$ and $1\text{s}$ ) of MeLi/ <i>n</i> -BuLi (1:1) in THF- <i>d</i> <sub>8</sub> at 185K. (b) Build-up <sup>7</sup> Li exchange curves of mixed aggregates (MeLi) <sub>4-n</sub> ( <i>n</i> -BuLi) <sub>n</sub> obtained from 2D <sup>7</sup> Li- <sup>7</sup> Li EXSY experiments at 185K.                                                                                                                                                                                                                | 5S  |
| <b>Figure 4S.</b> 1D <sup>7</sup> Li spectra of EtLi/RLi mixtures (R = <i>n</i> -Bu (top), Me (bottom)) in THF- <i>d</i> <sub>8</sub> at 185K.                                                                                                                                                                                                                                                                                                                                                                                                                                                                                      | 6S  |
| <b>Figure 5S.</b> 1D <sup>7</sup> Li spectra of EtLi/RLi mixtures (R = <i>n</i> -Bu (top), Me (bottom)) in Et <sub>2</sub> O- <i>d</i> <sub>10</sub> at 185K.                                                                                                                                                                                                                                                                                                                                                                                                                                                                       | 7S  |
| <b>Figure 6S.</b> 1D <sup>7</sup> Li spectra of MeLi/RLi mixture (R = Et (top), <i>n</i> -Bu (bottom)) in <i>n</i> -Bu <sub>2</sub> O/Tol- <i>d</i> <sub>8</sub> at 185K.                                                                                                                                                                                                                                                                                                                                                                                                                                                           | 8S  |
| <b>Figure 7S.</b> (a) Statistical distribution of mixed aggregates (R <sub>1</sub> Li) <sub>4-n</sub> (R <sub>2</sub> Li) <sub>n</sub> as a function of R <sub>2</sub> Li molar proportion. (b, c) Experimental (based on <sup>7</sup> Li NMR signal integrations) distribution of mixed aggregates (MeLi) <sub>4-n</sub> (R <sub>2</sub> Li) <sub>n</sub> (R <sub>2</sub> = <i>n</i> -BuLi, Et) in <i>n</i> -Bu <sub>2</sub> O/Tol- <i>d</i> <sub>8</sub> at 185K as a function of R <sub>2</sub> Li molar proportion : (b) (MeLi) <sub>4-n</sub> ( <i>n</i> -BuLi) <sub>n</sub> ; (c) (MeLi) <sub>4-n</sub> (EtLi) <sub>n</sub> . | 9S  |
| <b>Table 1S:</b> Value of coupling constant ( <sup>2</sup> <i>J</i> <sub>Li-Li</sub> ) and exchange rate for mixed aggregates (MeLi) <sub>4-n</sub> ( <i>n</i> -BuLi) <sub>n</sub> in THF- <i>d</i> <sub>8</sub> at different temperature.                                                                                                                                                                                                                                                                                                                                                                                          | 10S |

## 1. General considerations:

Commercial Tetrahydrofuran- $d_8$ , Diethylether- $d_{10}$  and Toluene- $d_8$  were distilled over sodium and benzophenone. Argon was dried and deoxygenated by bubbling through a commercial solution of butyllithium in hexane. Commercial di- $n$ -butylether was distilled over  $\text{CaH}_2$ .

## 2. Experimental procedures

### 2.1. Alkylolithium salt-free solutions in tetrahydrofuran- $d_8$ or diethylether- $d_{10}$

A solution of Methyllithium in ether, Ethyllithium in cyclohexane or  $n$ -butyllithium in hexane was syringed in a tube fitted with a septum and flushed under dry argon. The tube was then placed under vacuum (20-25 mmHg) for 1 to 3 hours to evaporate all the solvent. The resulting solid was then dissolved in freshly distilled THF- $d_8$ ,  $\text{Et}_2\text{O}$ - $d_{10}$  and placed under vacuum for 1h to evaporate the last traces of solvent. A new volume of solvent (2 to 3 mL) was added and the resulting solution was titrated ( $\sim 0.5$  to  $0.7\text{M}$ ) using a procedure reported by Duhamel.<sup>1</sup>

### 2.2. Alkylolithium salt-free solutions in dibutylether/toluene- $d_8$ (80 :20)

A solution of Methyllithium in ether,  $n$ -BuLi in hexanes or EtLi in cyclohexane was syringed in a tube fitted with a septum and flushed under dry argon. The tube was then placed under vacuum (20-25 mmHg) for 1 to 3 hours to evaporate all the solvent. The resulting solid was then dissolved in freshly distilled mixture of dibutylether/toluene- $d_8$  (ratio 4 :1). The resulting solution was titrated ( $\sim 0.3$  to  $0.5\text{M}$ ) according to the literature.<sup>1</sup>

### 2.3. Methyllithium / $n$ -Butyllithium (ratio 1 : 1) in THF- $d_8$ solution

An equivalent of MeLi ( $\sim 0.7\text{M}$  in THF- $d_8$ ) was added at  $-78^\circ\text{C}$  to a solution of  $n$ -BuLi ( $\sim 0.5\text{M}$ ) in THF- $d_8$  (0.5 mL) placed into a dry 5-mm NMR tube, fitted with a septum and flushed under argon. The tube was vigorously shaken and was dropped in the pre-cooled NMR probe.

### 2.4. Methyllithium / Ethyllithium (ratio 1 : 0.8) in THF- $d_8$ solution

0.8 equivalent of EtLi ( $\sim 0.5\text{M}$  in THF- $d_8$ ) was added at  $-78^\circ\text{C}$  to a solution of MeLi ( $\sim 0.7\text{M}$ ) in THF- $d_8$  (0.5 mL) placed into a dry 5-mm NMR tube, fitted with a septum and flushed under argon. The tube was vigorously shaken and was dropped in the pre-cooled NMR probe.

### 2.5. Ethyllithium/ $n$ -Butyllithium (ratio 1 : 0.8) in THF- $d_8$ solution

0.8 equivalent of  $n$ -BuLi ( $\sim 0.5\text{M}$ ) in THF- $d_8$  was added at  $-78^\circ\text{C}$  to a solution of EtLi ( $\sim 0.5\text{M}$  in THF- $d_8$ ) (0.5 mL) placed into a dry 5-mm NMR tube, fitted with a septum and flushed under argon. The tube was vigorously shaken and was dropped in the pre-cooled NMR probe.

### 2.6. Alkylolithium mixture (ratio 1 : 1) in $\text{Et}_2\text{O}$ or ( $n$ -Bu) $_2\text{O}$ solution

An equivalent of MeLi ( $\sim 0.7\text{M}$  in  $\text{Et}_2\text{O}$ - $d_{10}$ ,  $\sim 0.5\text{M}$  in ( $n$ -Bu) $_2\text{O}$ ) was added at  $-78^\circ\text{C}$  to a solution of  $n$ -BuLi or EtLi ( $\sim 0.5\text{M}$ ) in  $\text{Et}_2\text{O}$ - $d_{10}$  or ( $\sim 0.3\text{M}$ ) in ( $n$ -Bu) $_2\text{O}$  (0.5 mL) into a dry 5-mm NMR tube, fitted with a septum and flushed under argon. The tube was vigorously shaken and was dropped in the pre-cooled NMR probe.

## 2.7. NMR parameters and conditions:

All NMR experiments were recorded on a Bruker Avance DMX 500 spectrometer operating at 500.13 MHz for  $^1\text{H}$  and 194.4 MHz for  $^7\text{Li}$ . Experiments were run under Topspin (version 2.1) with a BBFO  $\{^1\text{H},\text{X}\}$  probe and a z gradient unit.

**1D NMR Measurements:** Lithium one dimensional experiments were recorded with standard parameters, 32 scans, an acquisition time of 5s and a relaxation delay of 10s.

**2D  $^7\text{Li}$ - $^7\text{Li}$  EXSY:** The following parameters were used for acquiring and processing the spectrum: 256 experiments with 2048 data points and 16 scans each were recorded. The relaxation time was 5s. Pure phase line shapes was obtained by using time proportional phase incrementation (TPPI) phase cycling. The mixing time was  $\tau_m = 0.4\text{s}$  to  $\tau_m = 1\text{s}$ . One time zero filling was applied to obtain a digital resolution of 0.94 Hz/point in f1 and 0.94 Hz/point in f2. The temperature range was between 205K and 175K.

**2D  $^7\text{Li}$ - $^7\text{Li}$  CT-COSY:** The following parameters were used for acquiring and processing the spectrum: 256 experiments with 2048 data points with 4 scan each were recorded. The relaxation time was 5s. The delta delay was between 40ms and 500ms. One time zero filling in f1 to obtain a digital resolution of 0.47 Hz/point in f1 and 1.33 Hz/point in f2.

## 3. References

(1) Duhamel, L.; Plaquevent, J.-C. *J. Organomet. Chem.* **1993**, *448*, 1-3.

## 4. NMR Data

**Figure 1S:** Variable temperature NMR 1D  $^7\text{Li}$  spectra of MeLi/*n*-BuLi mixture in THF- $d_8$ .

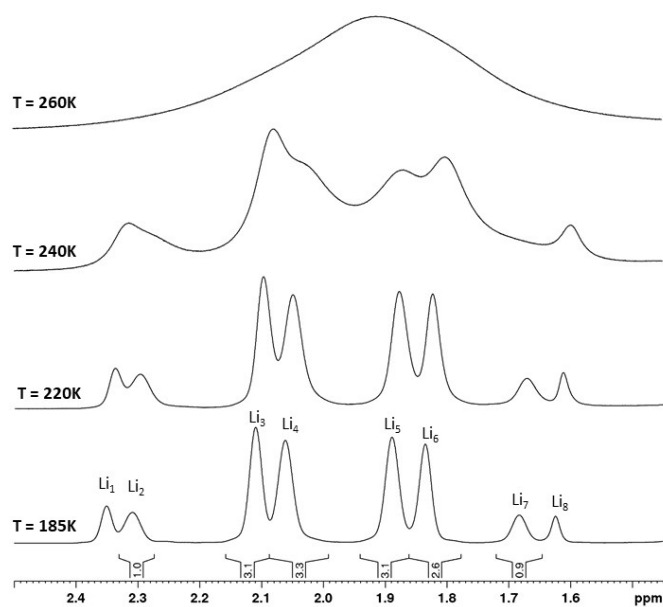

**Figure 2S:** Plot of the intensity ratio  $I_{\text{cross}}/I_{\text{diag}}$  versus constant time for  $(\text{MeLi})_{4-n}(\text{n-BuLi})_n$  mixed aggregates.

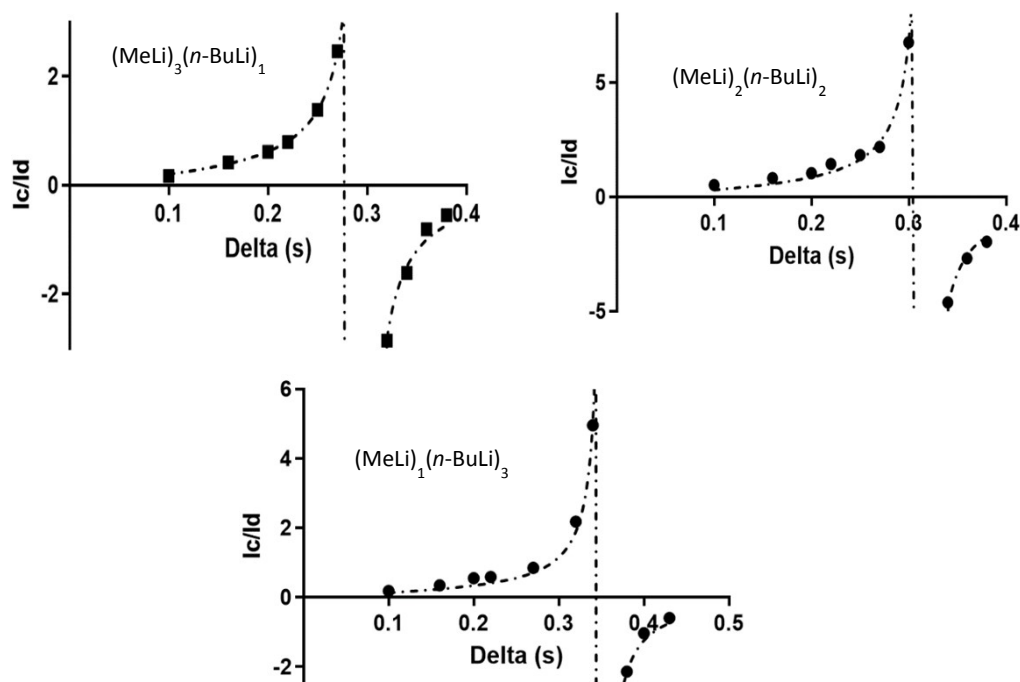

**Figure 3S:** (a) 2D  $^7\text{Li}$ - $^7\text{Li}$  EXSY (mixing times  $\tau_m = 0.5\text{s}$ ,  $0.7\text{s}$  and  $1\text{s}$ ) spectra of MeLi/*n*-BuLi (1:1) in THF- $d_8$  at 185K. (b) Build-up  $^7\text{Li}$  exchange curves of mixed aggregates  $(\text{MeLi})_{4-n}(\text{n-BuLi})_n$  obtained from 2D  $^7\text{Li}$ - $^7\text{Li}$  EXSY experiments at 185K.

(a)

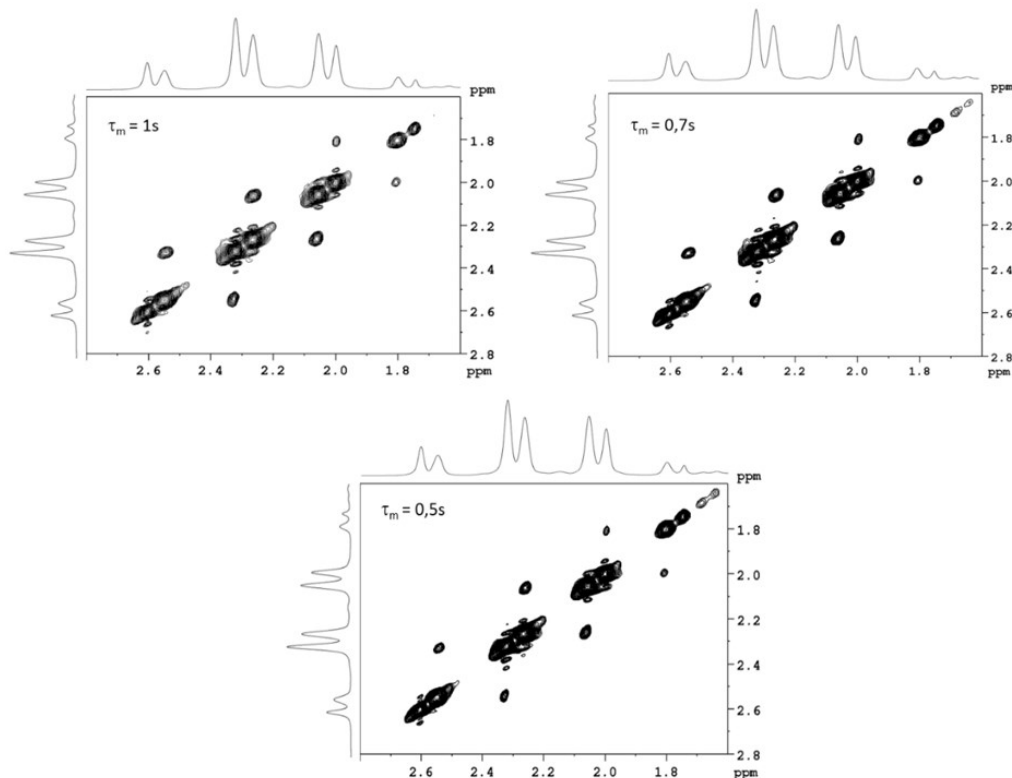

(b)

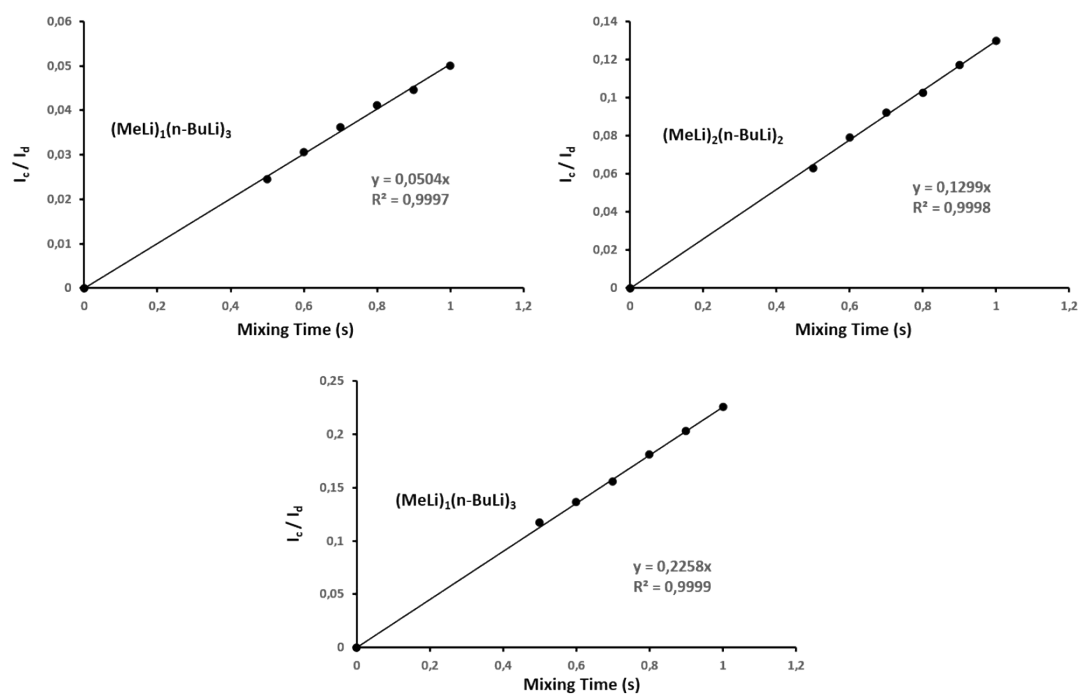

**Figure 4S:** 1D  $^7\text{Li}$  spectra of EtLi/RLi mixtures (R = *n*-Bu (top), Me (bottom)) in THF- $d_8$  at 185K.

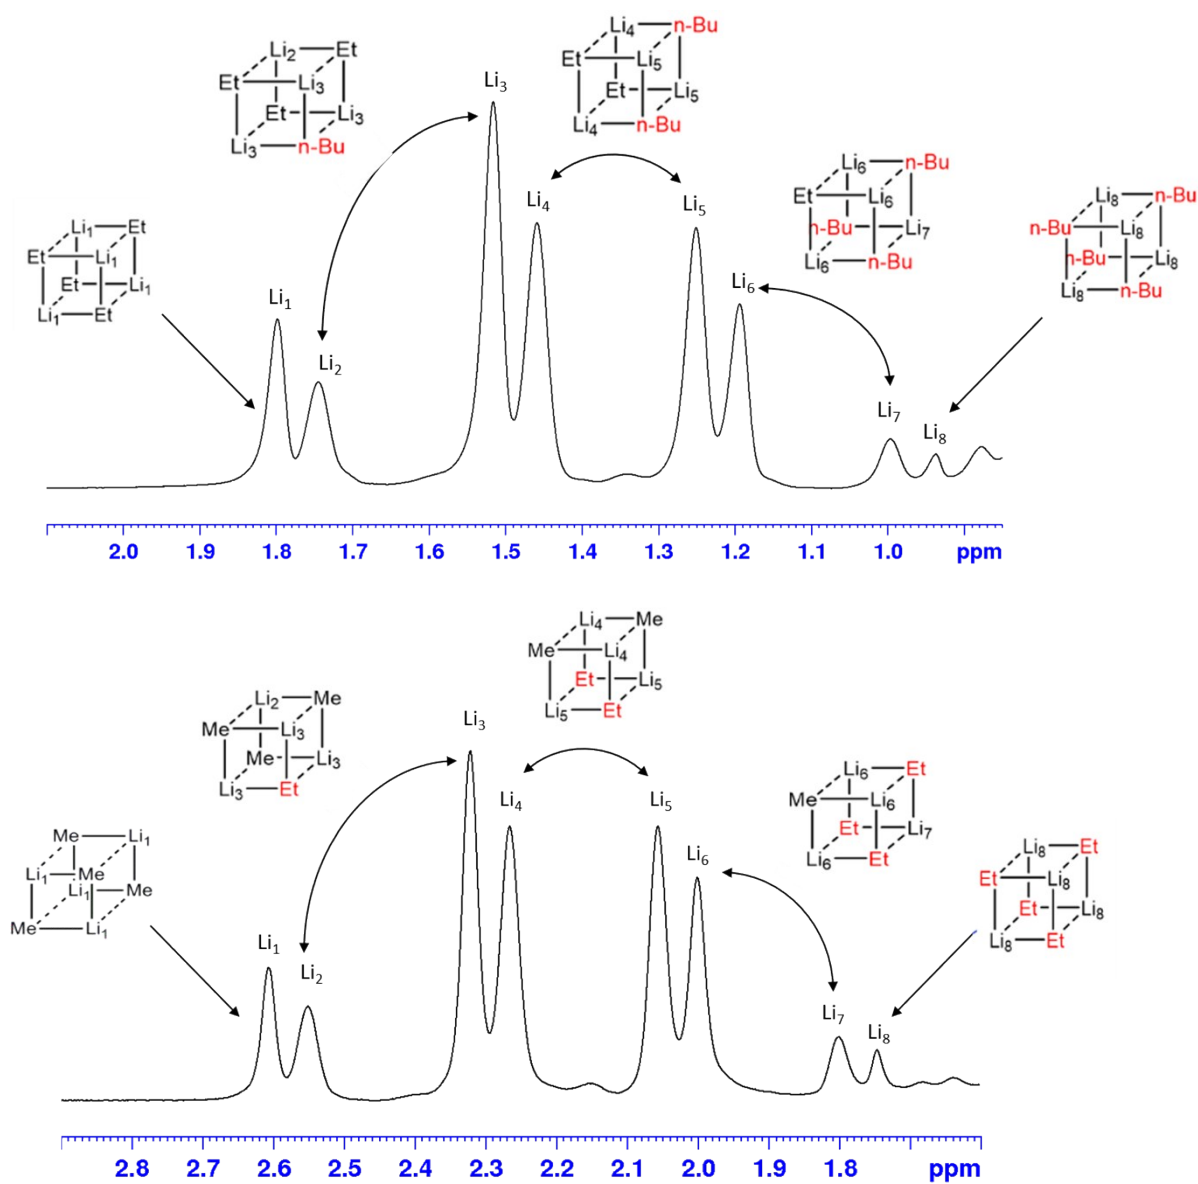

**Figure 5S:** 1D  $^7\text{Li}$  spectra of EtLi/RLi mixtures (R = Me (top), *n*-Bu (bottom)) in Et<sub>2</sub>O-*d*<sub>10</sub> at 185K.

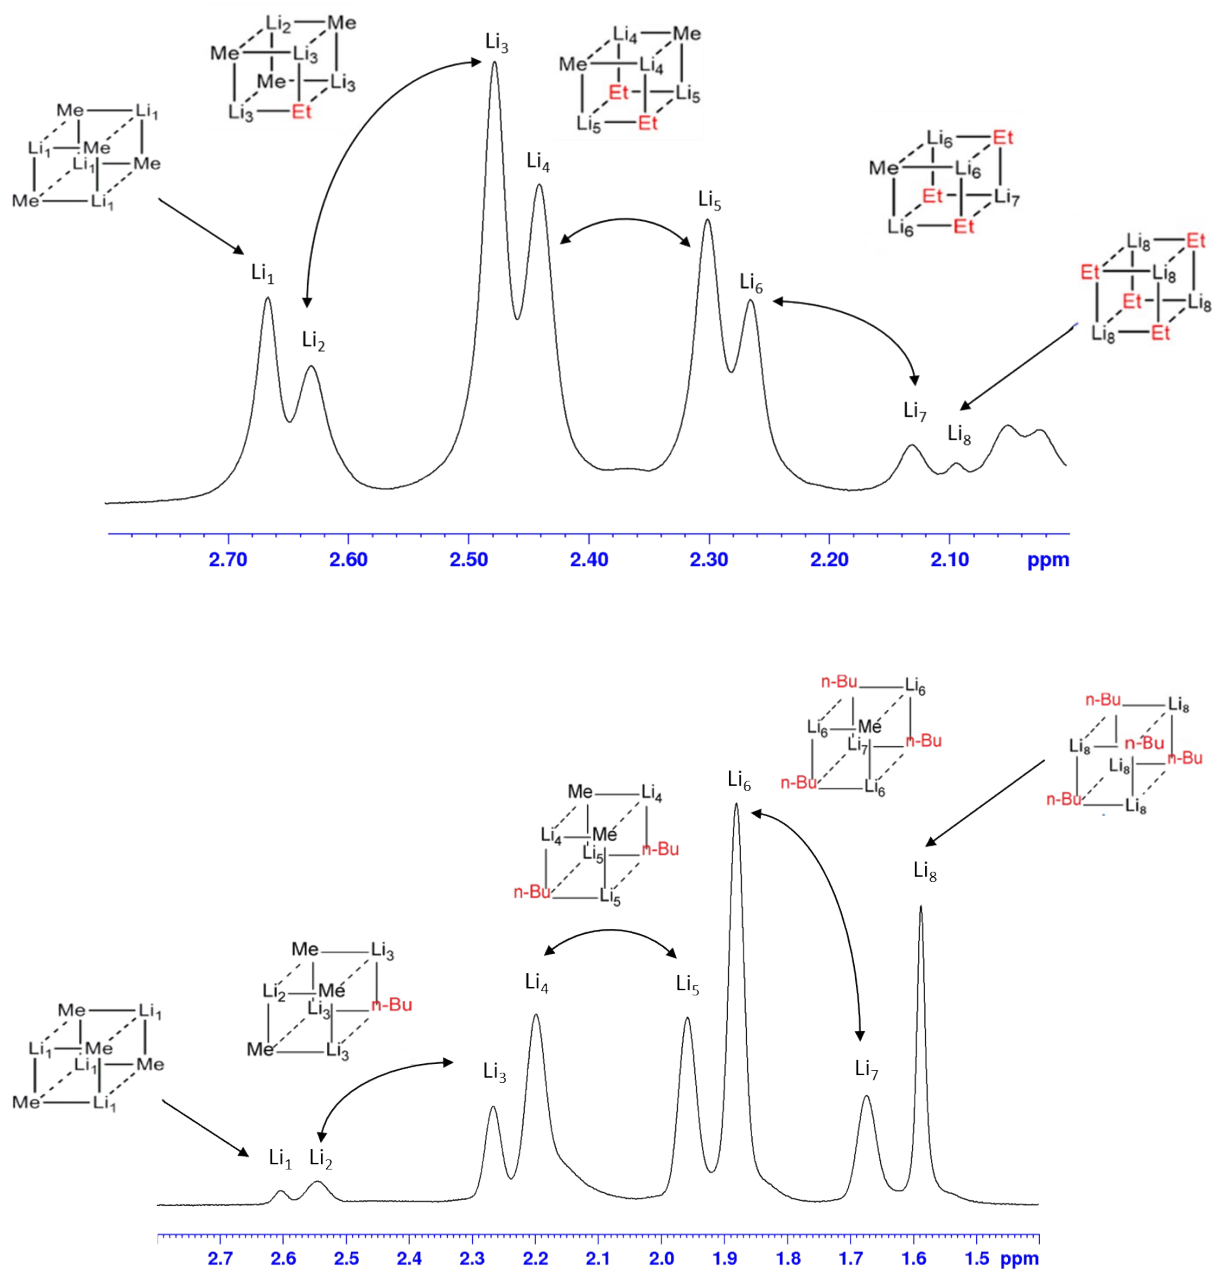

**Figure 6S:** 1D  $^7\text{Li}$  spectra of MeLi/RLi mixture (R = Et (top), *n*-Bu (bottom)) in *n*-Bu<sub>2</sub>O/Tol-*d*<sub>8</sub> at 185K.

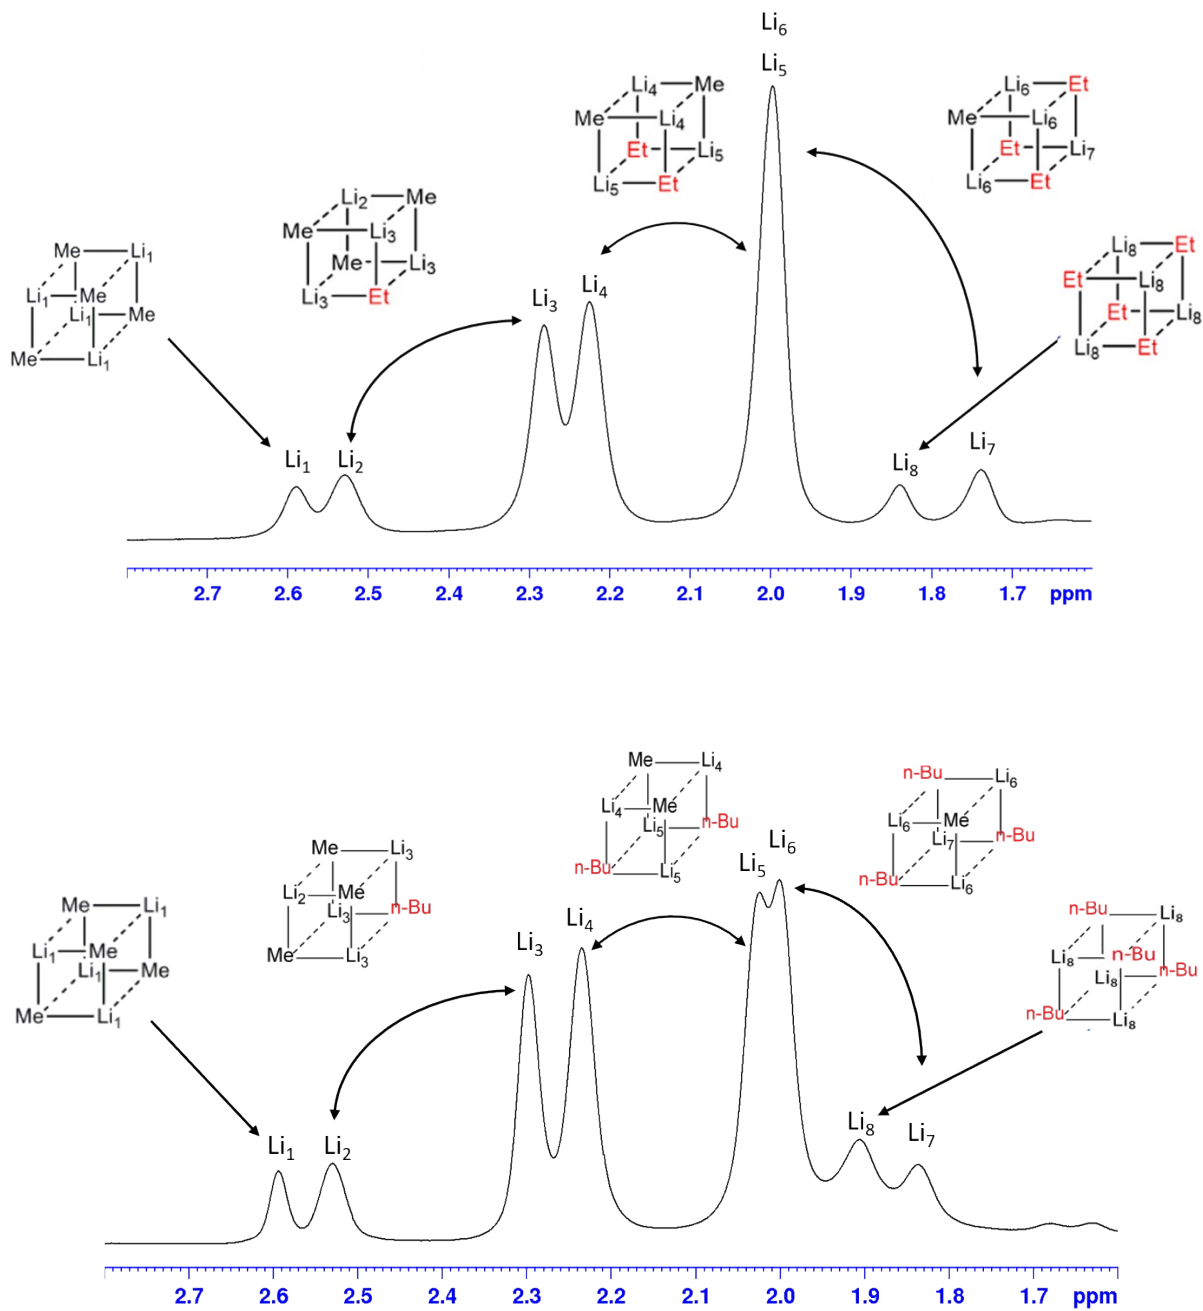



**Figure 7S:** (a) Statistical distribution of mixed aggregates  $(R_1Li)_{4-n}(R_2Li)_n$  as a function of  $R_2Li$  molar proportion. Experimental (based on 1D  $^7Li$  NMR signal integrations) distribution of mixed aggregates  $(MeLi)_{4-n}(R_2Li)_n$  ( $R_2=n-BuLi, Et$ ) in  $n-Bu_2O/Tol-d_8$  at 185K as a function of  $R_2Li$  molar proportion : (b)  $(MeLi)_{4-n}(n-BuLi)_n$ ; (c)  $(MeLi)_{4-n}(EtLi)_n$ .

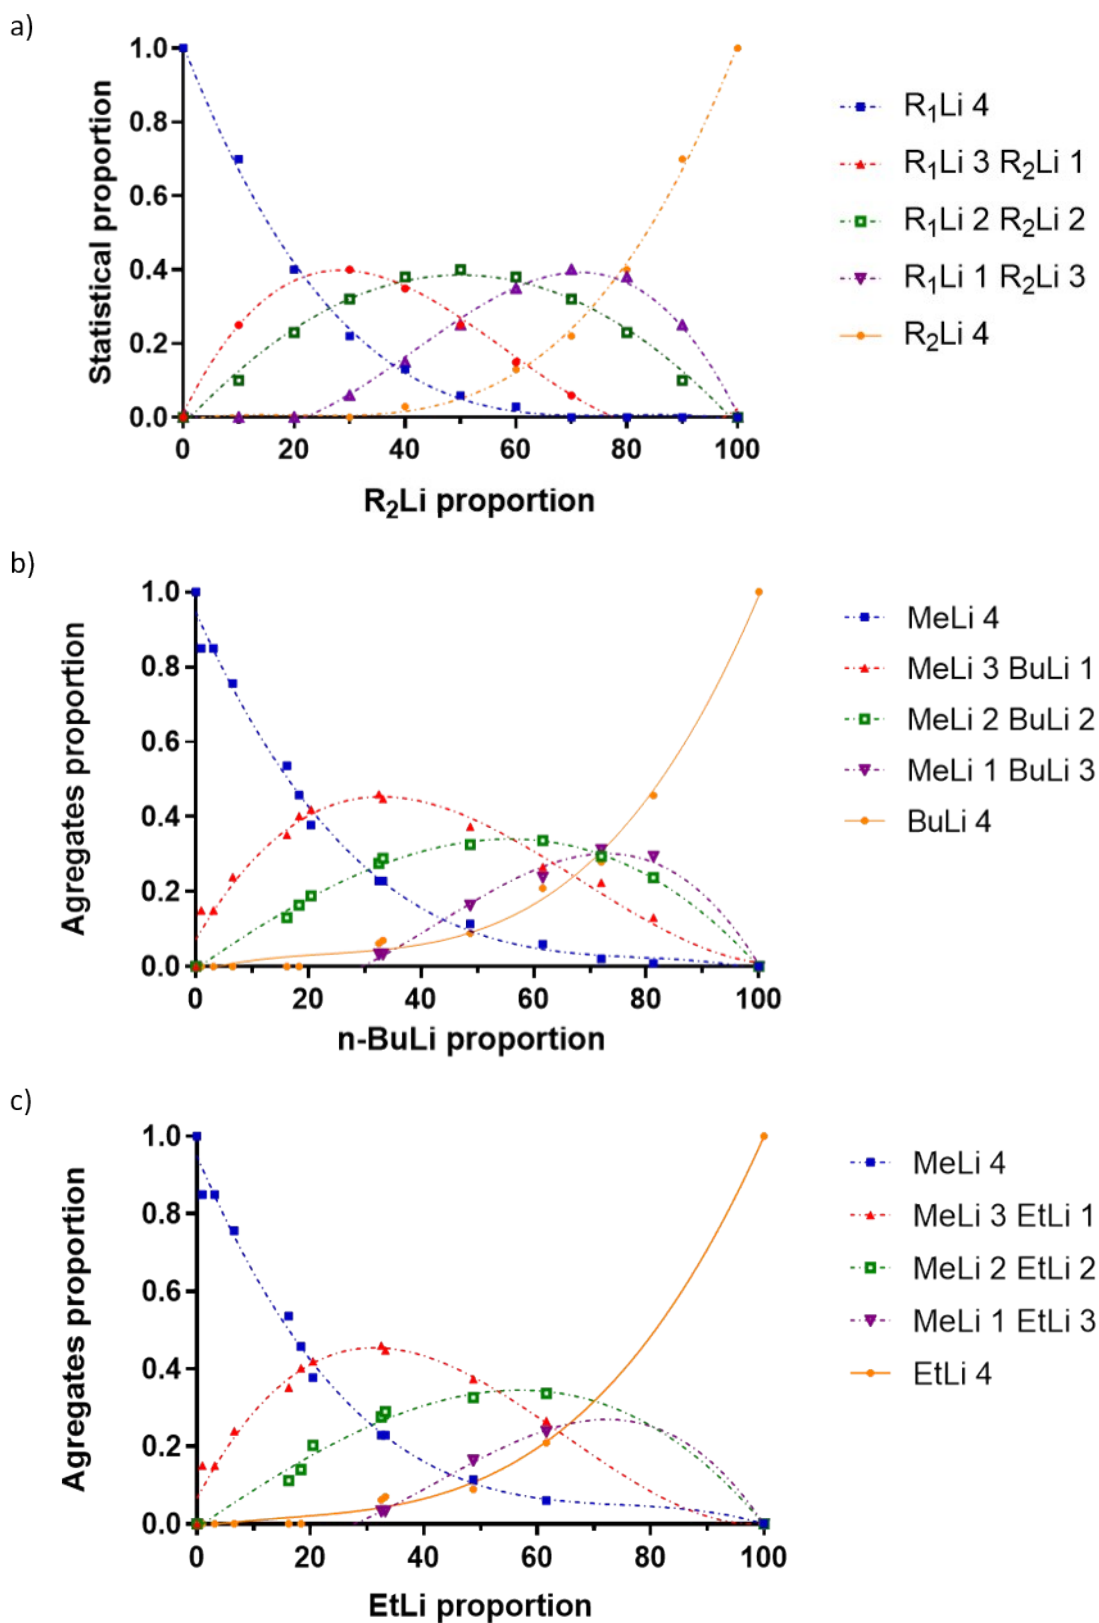

**Table 1S:** Value of coupling constant ( ${}^2J_{\text{Li-Li}}$ ) and exchange rate for mixed aggregates  $(\text{MeLi})_4$ - $(n\text{-BuLi})_n$  in THF- $d_8$  at different temperature.

| <b>T (K)</b> | <b>(MeLi)<sub>3</sub>(n-BuLi)<sub>1</sub></b> |                        | <b>(MeLi)<sub>2</sub>(n-BuLi)<sub>2</sub></b> |                        | <b>(MeLi)<sub>1</sub>(n-BuLi)<sub>3</sub></b> |                        |
|--------------|-----------------------------------------------|------------------------|-----------------------------------------------|------------------------|-----------------------------------------------|------------------------|
|              | ${}^2J_{\text{Li-Li}}$ (Hz)                   | $k$ (s <sup>-1</sup> ) | ${}^2J_{\text{Li-Li}}$ (Hz)                   | $k$ (s <sup>-1</sup> ) | ${}^2J_{\text{Li-Li}}$ (Hz)                   | $k$ (s <sup>-1</sup> ) |
| <b>175</b>   | 0.5614 ±0.0009                                | 0.033                  | 0.5265±0.0009                                 | 0.093                  | 0.4733±0.0009                                 | 0.194                  |
| <b>180</b>   | 0.5612±0.0007                                 | 0.041                  | 0.5263±0.0009                                 | 0.102                  | 0.4726±0.0010                                 | 0.225                  |
| <b>185</b>   | 0.5610±0.0008                                 | 0.050                  | 0.5260±0.0009                                 | 0.130                  | 0.4730±0.0009                                 | 0.215                  |
| <b>190</b>   | 0.5609±0.0005                                 | 0.056                  | 0.5253±0.0010                                 | 0.136                  | 0.4717±0.0004                                 | 0.250                  |
| <b>193</b>   | 0.5606±0.0010                                 | 0.066                  | 0.5243±0.0005                                 | 0.179                  | 0.4715±0.0003                                 | 0.281                  |
| <b>198</b>   | 0.5593±0.0008                                 | 0.118                  | 0.5215±0.0008                                 | 0.349                  | 0.4662±0.0008                                 | 0.635                  |
| <b>200</b>   | 0.5579±0.0007                                 | 0.172                  | 0.5166±0.0010                                 | 0.576                  | 0.4597±0.0003                                 | 1.020                  |
| <b>205</b>   | 0.5577±0.0008                                 | 0.183                  | 0.5144±0.0006                                 | 0.699                  | 0.4580±0.0004                                 | 1.184                  |
